# Supplementary material
Source: PubMed Central journal article supplement (PMC5932376)
Supplement: sph003182532sf1.pdf [file sph003182532sf1.pdf]

*Staphylococcus aureus* CC8

Tree scale: 0.0001

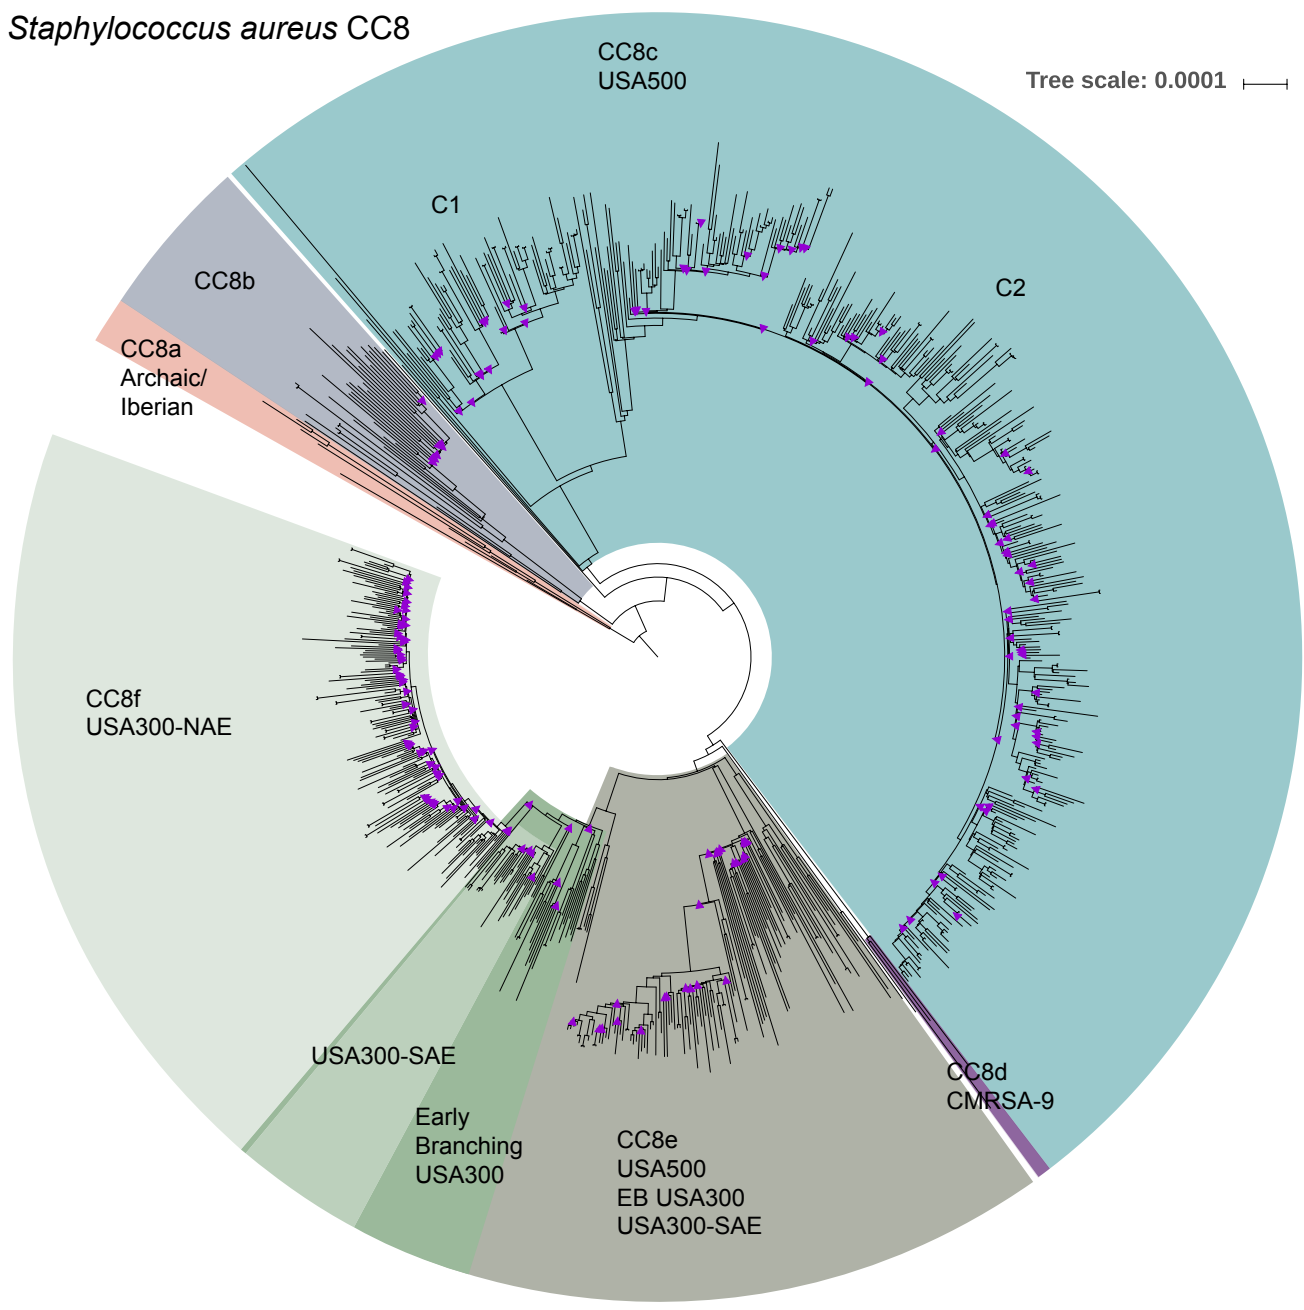

CC8c  
USA500

C1

CC8b

CC8a  
Archaic/  
Iberian

C2

CC8f  
USA300-NAE

USA300-SAE

Early  
Branching  
USA300

CC8e  
USA500  
EB USA300  
USA300-SAE

CC8d  
CMRSA-9
